# Supplementary material
Source: publisher figshare collection journal article supplement (https://karger.figshare.com/articles/dataset/_/8942318)
Supplement: Supplementary file 1 [file 1 › 501383_sm1.pdf]

## Supplementary Figure 1

**A**

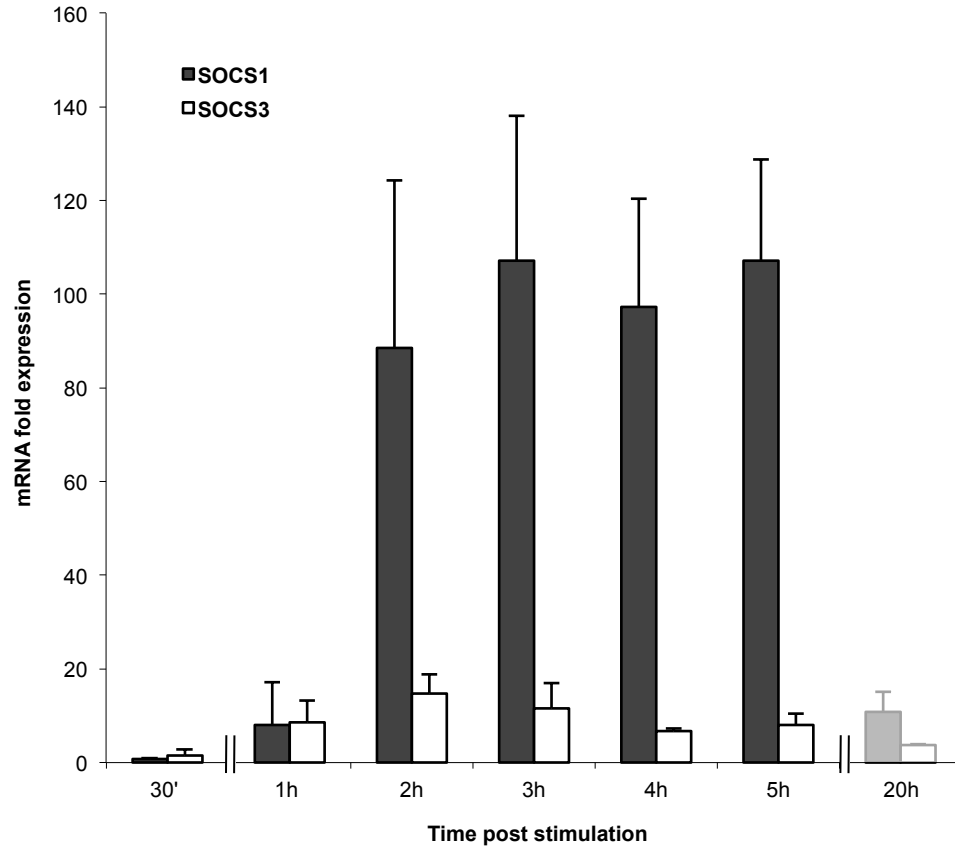

**B**

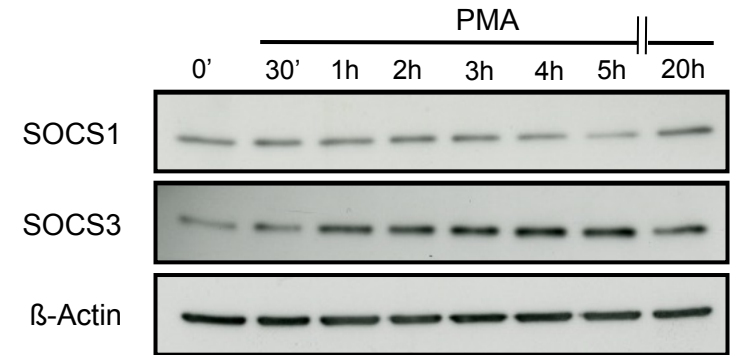

### Supplementary Figure 1. Modulation of SOCS1 and SOCS3 in PMA stimulated HMVEC.

Time course analysis of HMVEC stimulated with 500ng/ml PMA shows mRNA (A) expression levels for SOCS1 and SOCS3, given as fold expression related to the untreated control and normalized to GAPDH expression. Shown is the mean and SD of duplicates in one representative out of 3 independent experiments. In (B) western blot analysis of SOCS1 and SOCS3 protein expression is shown. At 5 hours p.s. cells were washed and incubated in normal medium for 15 additional hours.
