# Supplementary material
Source: publisher figshare collection journal article supplement (https://karger.figshare.com/articles/dataset/_/8942318)
Supplement: Supplementary file 1 [file 1 › 501383_sm2.pdf]

## Supplementary Figure 2

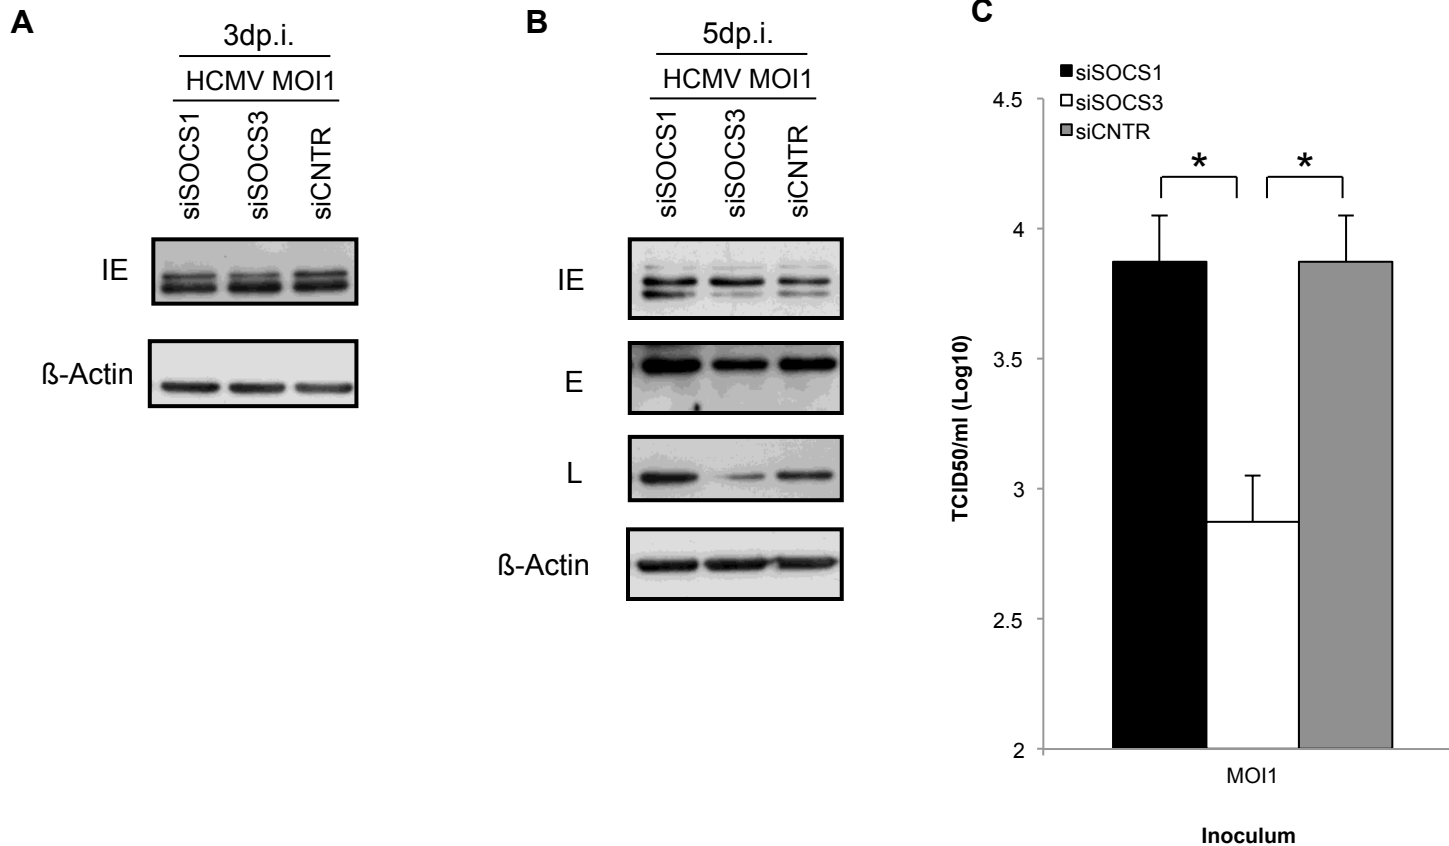

### Supplementary Figure 2. Silencing of SOCS3 following HCMV infection inhibits viral replication.

HMVEC were transfected with siSOCS1, siSOCS3 or siCNTR 1 hour p.i.. Western blot analysis shows the expression pattern of IE, E and L viral antigens in the three conditions (siSOCS1, siSOCS3 and siCNTR) at 3 days (A) and 5 days (B) p.i.. In (C) is shown the titration of the supernatant collected 5 days p.i. in siSOCS1, siSOCS3 and siCNTR infected cultures. Shown are mean values and SD of two independent experiments, with \* $p < 0.05$ .
